# Supplementary material
Source: PubMed Central journal article supplement (PMC7674039)
Supplement: AAC.00731-20-s0001.pdf [file AAC.00731-20-s0001.pdf]

**Supplementary Table S1.** Renal function category shift (ITT population)

| <b>Baseline renal function category (CL<sub>CR</sub>)</b> | <b>Postbaseline renal function category</b> | <b>C/T<br/>(N<sup>a</sup>=361),<br/>n/N1 (%)</b> | <b>MEM<br/>(N<sup>a</sup>=359),<br/>n/N1 (%)</b> |
|-----------------------------------------------------------|---------------------------------------------|--------------------------------------------------|--------------------------------------------------|
| Normal renal function (≥80 mL/min)                        | Normal                                      | 221/227 (97.4)                                   | 229/235 (97.4)                                   |
|                                                           | Mild                                        | 4/227 (1.8)                                      | 4/235 (1.7)                                      |
|                                                           | Moderate                                    | 0/227                                            | 0/235                                            |
|                                                           | Severe                                      | 2/227 (0.9)                                      | 2/235 (0.9)                                      |
|                                                           | ESRD                                        | 0/227                                            | 0/235                                            |
| Mild RI (>50 to <80 mL/min)                               | Normal                                      | 17/82 (20.7)                                     | 20/77 (26.0)                                     |
|                                                           | Mild                                        | 62/82 (75.6)                                     | 52/77 (67.5)                                     |
|                                                           | Moderate                                    | 2/82 (2.4)                                       | 4/77 (5.2)                                       |
|                                                           | Severe                                      | 1/82 (1.2)                                       | 1/77 (1.3)                                       |
|                                                           | ESRD                                        | 0/82                                             | 0/77                                             |
| Moderate RI (≥30 to ≤50 mL/min)                           | Normal                                      | 2/35 (5.7)                                       | 2/26 (7.7)                                       |

|                                         |          |              |              |
|-----------------------------------------|----------|--------------|--------------|
|                                         | Mild     | 10/35 (28.6) | 9/26 (34.6)  |
|                                         | Moderate | 20/35 (57.1) | 12/26 (46.2) |
|                                         | Severe   | 3/35 (8.6)   | 3/26 (11.5)  |
|                                         | ESRD     | 0/35         | 0/26         |
| Severe RI ( $\geq 15$ to $< 30$ mL/min) | Normal   | 0/17         | 0/21         |
|                                         | Mild     | 3/17 (17.6)  | 2/21 (9.5)   |
|                                         | Moderate | 4/17 (23.5)  | 4/21 (19.0)  |
|                                         | Severe   | 10/17 (58.8) | 15/21 (71.4) |
|                                         | ESRD     | 0/17         | 0/21         |

---

CL<sub>CR</sub>, creatinine clearance; C/T, ceftolozane/tazobactam; ESRD, end-stage renal disease; ITT, intention-to-treat; MEM, meropenem; RI, renal impairment.

<sup>a</sup>N=Number of patients randomized to receive treatment. Six patients were not treated; of those, four patients were missing baseline CL<sub>CR</sub>, one patient had normal baseline renal function, and one patient had ESRD at baseline.

**Supplementary Table S2.** Clinical response at TOC visit by baseline CL<sub>CR</sub> group (ITT population)

|                                     | Normal renal function<br>(CL <sub>CR</sub> ≥80 mL/min) |            | Mild RI<br>(CL <sub>CR</sub> >50 to <80<br>mL/min) |           | Moderate RI<br>(CL <sub>CR</sub> ≥30 to ≤50<br>mL/min) |           | Severe RI<br>(CL <sub>CR</sub> ≥15 to <30<br>mL/min) |           |
|-------------------------------------|--------------------------------------------------------|------------|----------------------------------------------------|-----------|--------------------------------------------------------|-----------|------------------------------------------------------|-----------|
|                                     | C/T                                                    | MEM        | C/T                                                | MEM       | C/T                                                    | MEM       | C/T                                                  | MEM       |
|                                     | (n=227)                                                | (n=236)    | (n=82)                                             | (n=77)    | (n=35)                                                 | (n=26)    | (n=17)                                               | (n=21)    |
| Cure                                | 132 (58.1)                                             | 138 (58.5) | 45 (54.9)                                          | 35 (45.5) | 13 (37.1)                                              | 11 (42.3) | 7 (41.2)                                             | 10 (47.6) |
| Failure                             | 95 (41.9)                                              | 98 (41.5)  | 37 (45.1)                                          | 42 (54.5) | 22 (62.9)                                              | 15 (57.7) | 10 (58.8)                                            | 11 (52.4) |
| Observed failure                    | 15 (6.6)                                               | 14 (5.9)   | 3 (3.7)                                            | 6 (7.8)   | 1 (2.9)                                                | 3 (11.5)  | —                                                    | —         |
| Failure carried<br>forward from EOT | 51 (22.5)                                              | 43 (18.2)  | 17 (20.7)                                          | 19 (24.7) | 12 (34.3)                                              | 7 (26.9)  | 6 (35.3)                                             | 5 (23.8)  |
| Observed<br>indeterminate           | 14 (6.2)                                               | 18 (7.6)   | 6 (7.3)                                            | 8 (10.4)  | 6 (17.1)                                               | 4 (15.4)  | 1 (5.9)                                              | 2 (9.5)   |
| Died from cause<br>other than VNP   | 9 (4.0)                                                | 7 (3.0)    | 6 (7.3)                                            | 4 (5.2)   | 3 (8.6)                                                | 3 (11.5)  | 1 (5.9)                                              | 2 (9.5)   |
| Other                               | 5 (2.2)                                                | 11 (4.7)   | 0                                                  | 4 (5.2)   | 3 (8.6)                                                | 1 (3.8)   | —                                                    | —         |

|                 |          |          |           |          |         |         |          |          |
|-----------------|----------|----------|-----------|----------|---------|---------|----------|----------|
| Imputed         |          |          |           |          |         |         |          |          |
| indeterminate   | 15 (6.6) | 23 (9.7) | 11 (13.4) | 9 (11.7) | 3 (8.6) | 1 (3.8) | 3 (17.6) | 4 (19.0) |
| Died from cause |          |          |           |          |         |         |          |          |
| other than VNP  | 11 (4.8) | 13 (5.5) | 8 (9.8)   | 7 (9.1)  | 2 (5.7) | 1 (3.8) | 3 (17.6) | 4 (19.0) |
| Other           | 4 (1.8)  | 10 (4.2) | 3 (3.7)   | 2 (2.6)  | 1 (2.9) | 0       | —        | —        |

---

CL<sub>CR</sub>, creatinine clearance; C/T, ceftolozane/tazobactam; EOT, end of treatment; ITT, intention-to-treat; MEM, meropenem; RI, renal impairment; TOC, test of cure; VNP, ventilated nosocomial pneumonia.

**Supplementary Table S3.** Summary of AEs<sup>a</sup> by renal function group (safety population)

| AE category, <i>n</i> (%)                   | Normal renal function                  |                  |                                              |                  |                                                  |                 |                                                |                 |
|---------------------------------------------|----------------------------------------|------------------|----------------------------------------------|------------------|--------------------------------------------------|-----------------|------------------------------------------------|-----------------|
|                                             | function (CL <sub>CR</sub> ≥80 mL/min) |                  | Mild RI (CL <sub>CR</sub> >50 to <80 mL/min) |                  | Moderate RI (CL <sub>CR</sub> ≥30 to ≤50 mL/min) |                 | Severe RI (CL <sub>CR</sub> ≥15 to <30 mL/min) |                 |
|                                             | C/T                                    | MEM              | C/T                                          | MEM              | C/T                                              | MEM             | C/T                                            | MEM             |
|                                             | ( <i>n</i> =227)                       | ( <i>n</i> =235) | ( <i>n</i> =82)                              | ( <i>n</i> =77)  | ( <i>n</i> =35)                                  | ( <i>n</i> =26) | ( <i>n</i> =17)                                | ( <i>n</i> =21) |
| <b>Blood and lymphatic system disorders</b> | <b>31 (13.7)</b>                       | <b>46 (19.6)</b> | <b>11 (13.4)</b>                             | <b>8 (10.4)</b>  | <b>6 (17.1)</b>                                  | <b>9 (34.6)</b> | <b>4 (23.5)</b>                                | <b>6 (28.6)</b> |
| Anemia                                      | 15 (6.6)                               | 23 (9.8)         | 10 (12.2)                                    | 6 (7.8)          | 5 (14.3)                                         | 3 (11.5)        | 2 (11.8)                                       | 6 (28.6)        |
| Anemia of chronic disease                   | 3 (1.3)                                | 1 (0.4)          | 0                                            | 0                | 0                                                | 1 (3.8)         | 2 (11.8)                                       | 0               |
| Leukocytosis                                | 2 (0.9)                                | 0                | 0                                            | 0                | 0                                                | 1 (3.8)         | 1 (5.9)                                        | 0               |
| Thrombocytopenia                            | 1 (0.4)                                | 11 (4.7)         | 0                                            | 2 (2.6)          | 1 (2.9)                                          | 3 (11.5)        | 0                                              | 1 (4.8)         |
| <b>Cardiac disorders</b>                    | <b>33 (14.5)</b>                       | <b>36 (15.3)</b> | <b>15 (18.3)</b>                             | <b>22 (28.6)</b> | <b>9 (25.7)</b>                                  | <b>8 (30.8)</b> | <b>3 (17.6)</b>                                | <b>6 (28.6)</b> |
| Atrial fibrillation                         | 4 (1.8)                                | 7 (3.0)          | 3 (3.7)                                      | 6 (7.8)          | 1 (2.9)                                          | 2 (7.7)         | 1 (5.9)                                        | 1 (4.8)         |
| Bradycardia                                 | 4 (1.8)                                | 2 (0.9)          | 0                                            | 3 (3.9)          | 0                                                | 1 (3.8)         | 1 (5.9)                                        | 1 (4.8)         |
| Cardiac failure                             | 4 (1.8)                                | 1 (0.4)          | 2 (2.4)                                      | 1 (1.3)          | 1 (2.9)                                          | 1 (3.8)         | 1 (5.9)                                        | 0               |

|                                             |                  |                  |                  |                  |                 |                 |                 |                  |
|---------------------------------------------|------------------|------------------|------------------|------------------|-----------------|-----------------|-----------------|------------------|
| Cardiac failure acute                       | 4 (1.8)          | 6 (2.6)          | 2 (2.4)          | 1 (1.3)          | 2 (5.7)         | 1 (3.8)         | 1 (5.9)         | 0                |
| <b>Gastrointestinal disorders</b>           | <b>55 (24.2)</b> | <b>55 (23.4)</b> | <b>19 (23.2)</b> | <b>15 (19.5)</b> | <b>9 (25.7)</b> | <b>9 (34.6)</b> | <b>5 (29.4)</b> | <b>10 (47.6)</b> |
| Diarrhea                                    | 14 (6.2)         | 19 (8.1)         | 6 (7.3)          | 1 (1.3)          | 1 (2.9)         | 1 (3.8)         | 2 (11.8)        | 4 (19.0)         |
| Gastritis erosive                           | 4 (1.8)          | 1 (0.4)          | 0                | 1 (1.3)          | 2 (5.7)         | 0               | 0               | 1 (4.8)          |
| Gastrointestinal hemorrhage                 | 5 (2.2)          | 1 (0.4)          | 1 (1.2)          | 1 (1.3)          | 1 (2.9)         | 3 (11.5)        | 0               | 1 (4.8)          |
| Gastrointestinal hypomobility               | 0                | 2 (0.9)          | 0                | 2 (2.6)          | 0               | 0               | 1 (5.9)         | 0                |
| Hemorrhagic erosive gastritis               | 0                | 0                | 0                | 0                | 0               | 0               | 1 (5.9)         | 0                |
| Impaired gastric emptying                   | 1 (0.4)          | 3 (1.3)          | 2 (2.4)          | 0                | 0               | 0               | 1 (5.9)         | 0                |
| Intestinal ischemia                         | 0                | 0                | 0                | 0                | 0               | 0               | 1 (5.9)         | 0                |
| Peptic ulcer                                | 0                | 0                | 0                | 0                | 0               | 1 (3.8)         | 0               | 2 (9.5)          |
| Vomiting                                    | 6 (2.6)          | 5 (2.1)          | 2 (2.4)          | 1 (1.3)          | 2 (5.7)         | 1 (3.8)         | 2 (11.8)        | 3 (14.3)         |
| <b>General disorders and administration</b> | <b>27 (11.9)</b> | <b>28 (11.9)</b> | <b>15 (18.3)</b> | <b>10 (13.0)</b> | <b>5 (14.3)</b> | <b>5 (19.2)</b> | <b>2 (11.8)</b> | <b>8 (38.1)</b>  |
| <b>site conditions</b>                      |                  |                  |                  |                  |                 |                 |                 |                  |
| Death                                       | 2 (0.9)          | 1 (0.4)          | 1 (1.2)          | 1 (1.3)          | 0               | 0               | 0               | 2 (9.5)          |
| Generalized edema                           | 0                | 5 (2.1)          | 3 (3.7)          | 0                | 0               | 2 (7.7)         | 0               | 1 (4.8)          |
| Multi-organ failure                         | 6 (2.6)          | 1 (0.4)          | 5 (6.1)          | 5 (6.5)          | 2 (5.7)         | 1 (3.8)         | 1 (5.9)         | 3 (14.3)         |

|                                                        |                  |                  |                  |                  |                  |                  |                 |                 |
|--------------------------------------------------------|------------------|------------------|------------------|------------------|------------------|------------------|-----------------|-----------------|
| Pain                                                   | 0                | 1 (0.4)          | 0                | 0                | 0                | 0                | 1 (5.9)         | 1 (4.8)         |
| Pyrexia                                                | 7 (3.1)          | 7 (3.0)          | 2 (2.4)          | 0                | 3 (8.6)          | 0                | 0               | 1 (4.8)         |
| <b>Hepatobiliary disorders</b>                         | <b>6 (2.6)</b>   | <b>13 (5.5)</b>  | <b>2 (2.4)</b>   | <b>5 (6.5)</b>   | <b>3 (8.6)</b>   | <b>0</b>         | <b>0</b>        | <b>2 (9.5)</b>  |
| <b>Infections and infestations</b>                     | <b>75 (33.0)</b> | <b>86 (36.6)</b> | <b>25 (30.5)</b> | <b>25 (32.5)</b> | <b>19 (54.3)</b> | <b>10 (38.5)</b> | <b>5 (29.4)</b> | <b>9 (42.9)</b> |
| Clostridium difficile colitis                          | 6 (2.6)          | 0                | 0                | 0                | 1 (2.9)          | 1 (3.8)          | 1 (5.9)         | 0               |
| Conjunctivitis                                         | 1 (0.4)          | 2 (0.9)          | 0                | 4 (5.2)          | 0                | 0                | 0               | 0               |
| Pneumonia, bacterial                                   | 0                | 0                | 0                | 1 (1.3)          | 2 (5.7)          | 0                | 0               | 0               |
| Sepsis                                                 | 3 (1.3)          | 2 (0.9)          | 1 (1.2)          | 1 (1.3)          | 5 (14.3)         | 1 (3.8)          | 1 (5.9)         | 0               |
| Septic shock                                           | 3 (1.3)          | 9 (3.8)          | 7 (8.5)          | 3 (3.9)          | 2 (5.7)          | 2 (7.7)          | 1 (5.9)         | 3 (14.3)        |
| Systemic candida                                       | 0                | 3 (1.3)          | 1 (1.2)          | 0                | 0                | 0                | 1 (5.9)         | 0               |
| Tinea cruris                                           | 0                | 0                | 0                | 0                | 0                | 0                | 1 (5.9)         | 0               |
| Urinary tract infection                                | 15 (6.6)         | 12 (5.1)         | 4 (4.9)          | 10 (13.0)        | 4 (11.4)         | 1 (3.8)          | 1 (5.9)         | 2 (9.5)         |
| Urinary tract infection fungal                         | 5 (2.2)          | 2 (0.9)          | 0                | 1 (1.3)          | 0                | 0                | 1 (5.9)         | 1 (4.8)         |
| Urosepsis                                              | 0                | 0                | 0                | 0                | 0                | 0                | 1 (5.9)         | 0               |
| <b>Injury, poisoning, and procedural complications</b> | <b>18 (7.9)</b>  | <b>16 (6.8)</b>  | <b>4 (4.9)</b>   | <b>3 (3.9)</b>   | <b>4 (11.4)</b>  | <b>2 (7.7)</b>   | <b>0</b>        | <b>2 (9.5)</b>  |

|                                           |                  |                  |                  |                  |                 |                 |                 |                 |
|-------------------------------------------|------------------|------------------|------------------|------------------|-----------------|-----------------|-----------------|-----------------|
| Post procedural hemorrhage                | 1 (0.4)          | 2 (0.9)          | 1 (1.2)          | 1 (1.3)          | 2 (5.7)         | 0               | 0               | 1 (4.8)         |
| <b>Investigations</b>                     | <b>47 (20.7)</b> | <b>35 (14.9)</b> | <b>18 (22.0)</b> | <b>8 (10.4)</b>  | <b>4 (11.4)</b> | <b>7 (26.9)</b> | <b>3 (17.6)</b> | <b>2 (9.5)</b>  |
| Alanine aminotransferase increased        | 16 (7.0)         | 10 (4.3)         | 4 (4.9)          | 2 (2.6)          | 1 (2.9)         | 1 (3.8)         | 0               | 1 (4.8)         |
| Aspartate aminotransferase increased      | 14 (6.2)         | 10 (4.3)         | 4 (4.9)          | 2 (2.6)          | 1 (2.9)         | 1 (3.8)         | 0               | 1 (4.8)         |
| Blood creatinine increased                | 2 (0.9)          | 1 (0.4)          | 2 (2.4)          | 0                | 0               | 2 (7.7)         | 0               | 0               |
| Blood urea increased                      | 1 (0.4)          | 0                | 2 (2.4)          | 0                | 0               | 2 (7.7)         | 0               | 0               |
| C-reactive protein increased              | 1 (0.4)          | 0                | 0                | 0                | 1 (2.9)         | 0               | 1 (5.9)         | 0               |
| Hepatic enzyme increased                  | 4 (1.8)          | 4 (1.7)          | 4 (4.9)          | 2 (2.6)          | 1 (2.9)         | 1 (3.8)         | 1 (5.9)         | 0               |
| <b>Metabolism and nutrition disorders</b> | <b>22 (9.7)</b>  | <b>36 (15.3)</b> | <b>17 (20.7)</b> | <b>11 (14.3)</b> | <b>5 (14.3)</b> | <b>4 (15.4)</b> | <b>3 (17.6)</b> | <b>8 (38.1)</b> |
| Diabetic ketoacidosis                     | 1 (0.4)          | 0                | 0                | 0                | 0               | 0               | 1 (5.9)         | 0               |
| Hyperkalemia                              | 1 (0.4)          | 2 (0.9)          | 3 (3.7)          | 0                | 0               | 0               | 0               | 3 (14.3)        |
| Hypernatremia                             | 3 (1.3)          | 4 (1.7)          | 2 (2.4)          | 0                | 1 (2.9)         | 2 (7.7)         | 0               | 4 (19.0)        |
| Hypoalbuminemia                           | 3 (1.3)          | 1 (0.4)          | 2 (2.4)          | 2 (2.6)          | 1 (2.9)         | 1 (3.8)         | 1 (5.9)         | 1 (4.8)         |
| Hypoglycemia                              | 1 (0.4)          | 2 (0.9)          | 2 (2.4)          | 4 (5.2)          | 1 (2.9)         | 1 (3.8)         | 0               | 2 (9.5)         |



|                                                        |                  |                  |                  |                  |                 |                 |                 |                 |
|--------------------------------------------------------|------------------|------------------|------------------|------------------|-----------------|-----------------|-----------------|-----------------|
| Hypokalemia                                            | 4 (1.8)          | 12 (5.1)         | 7 (8.5)          | 2 (2.6)          | 1 (2.9)         | 0               | 0               | 2 (9.5)         |
| Metabolic acidosis                                     | 3 (1.3)          | 0                | 1 (1.2)          | 0                | 0               | 0               | 1 (5.9)         | 0               |
| <b>Musculoskeletal and connective tissue disorders</b> | <b>5 (2.2)</b>   | <b>5 (2.1)</b>   | <b>1 (1.2)</b>   | <b>0</b>         | <b>0</b>        | <b>2 (7.7)</b>  | <b>0</b>        | <b>0</b>        |
| <b>Nervous system disorders</b>                        | <b>42 (18.5)</b> | <b>39 (16.6)</b> | <b>16 (19.5)</b> | <b>13 (16.9)</b> | <b>6 (17.1)</b> | <b>1 (3.8)</b>  | <b>2 (11.8)</b> | <b>3 (14.3)</b> |
| Brain midline shift                                    | 2 (0.9)          | 0                | 1 (1.2)          | 0                | 0               | 0               | 1 (5.9)         | 1 (4.8)         |
| Brain edema                                            | 6 (2.6)          | 9 (3.8)          | 1 (1.2)          | 2 (2.6)          | 1 (2.9)         | 0               | 1 (5.9)         | 0               |
| <b>Psychiatric disorders</b>                           | <b>12 (5.3)</b>  | <b>24 (10.2)</b> | <b>5 (6.1)</b>   | <b>2 (2.6)</b>   | <b>5 (14.3)</b> | <b>1 (3.8)</b>  | <b>0</b>        | <b>4 (19.0)</b> |
| Agitation                                              | 1 (0.4)          | 5 (2.1)          | 3 (3.7)          | 2 (2.6)          | 1 (2.9)         | 0               | 0               | 4 (19.0)        |
| Confusional state                                      | 0                | 7 (3.0)          | 1 (1.2)          | 0                | 2 (5.7)         | 0               | 0               | 0               |
| <b>Renal and urinary disorders</b>                     | <b>23 (10.1)</b> | <b>24 (10.2)</b> | <b>15 (18.3)</b> | <b>7 (9.1)</b>   | <b>8 (22.9)</b> | <b>7 (26.9)</b> | <b>3 (17.6)</b> | <b>2 (9.5)</b>  |
| Hematuria                                              | 1 (0.4)          | 2 (0.9)          | 0                | 2 (2.6)          | 0               | 2 (7.7)         | 0               | 1 (4.8)         |
| Renal cyst                                             | 0                | 1 (0.4)          | 0                | 0                | 2 (5.7)         | 0               | 0               | 0               |
| Renal failure                                          | 4 (1.8)          | 2 (0.9)          | 1 (1.2)          | 0                | 1 (2.9)         | 0               | 1 (5.9)         | 0               |
| Renal failure acute                                    | 6 (2.6)          | 8 (3.4)          | 6 (7.3)          | 2 (2.6)          | 3 (8.6)         | 2 (7.7)         | 2 (11.8)        | 1 (4.8)         |

|                                                         |                  |                  |                  |                  |                 |                  |                 |                 |
|---------------------------------------------------------|------------------|------------------|------------------|------------------|-----------------|------------------|-----------------|-----------------|
| <b>Respiratory, thoracic, and mediastinal disorders</b> | <b>45 (19.8)</b> | <b>53 (22.6)</b> | <b>20 (24.4)</b> | <b>12 (15.6)</b> | <b>8 (22.9)</b> | <b>11 (42.3)</b> | <b>3 (17.6)</b> | <b>7 (33.3)</b> |
| Acute pulmonary edema                                   | 1 (0.4)          | 0                | 0                | 0                | 0               | 2 (7.7)          | 0               | 0               |
| Acute respiratory failure                               | 0                | 3 (1.3)          | 2 (2.4)          | 0                | 0               | 2 (7.7)          | 0               | 0               |
| Aspiration                                              | 1 (0.4)          | 3 (1.3)          | 0                | 1 (1.3)          | 2 (5.7)         | 0                | 0               | 0               |
| Atelectasis                                             | 2 (0.9)          | 4 (1.7)          | 1 (1.2)          | 1 (1.3)          | 2 (5.7)         | 0                | 0               | 0               |
| Bronchospasm                                            | 1 (0.4)          | 4 (1.7)          | 0                | 0                | 0               | 3 (11.5)         | 0               | 0               |
| Chronic respiratory failure                             | 0                | 0                | 0                | 0                | 0               | 0                | 1 (5.9)         | 0               |
| Hydrothorax                                             | 7 (3.1)          | 11 (4.7)         | 7 (8.5)          | 8 (10.4)         | 2 (5.7)         | 1 (3.8)          | 0               | 0               |
| Pleural effusion                                        | 5 (2.2)          | 3 (1.3)          | 2 (2.4)          | 2 (2.6)          | 1 (2.9)         | 2 (7.7)          | 0               | 3 (14.3)        |
| Pulmonary congestion                                    | 0                | 0                | 0                | 0                | 0               | 0                | 1 (5.9)         | 0               |
| Pulmonary embolism                                      | 5 (2.2)          | 3 (1.3)          | 1 (1.2)          | 2 (2.6)          | 0               | 0                | 1 (5.9)         | 0               |
| Tachypnea                                               | 0                | 3 (1.3)          | 1 (1.2)          | 0                | 0               | 0                | 0               | 2 (9.5)         |
| <b>Skin and subcutaneous tissue disorders</b>           | <b>33 (14.5)</b> | <b>36 (15.3)</b> | <b>16 (19.5)</b> | <b>11 (14.3)</b> | <b>1 (2.9)</b>  | <b>1 (3.8)</b>   | <b>4 (23.5)</b> | <b>2 (9.5)</b>  |
| Decubitus ulcer                                         | 13 (5.7)         | 10 (4.3)         | 7 (8.5)          | 7 (9.1)          | 1 (2.9)         | 0                | 4 (23.5)        | 0               |

|                           |                  |                  |                |                  |                 |                 |                 |                 |
|---------------------------|------------------|------------------|----------------|------------------|-----------------|-----------------|-----------------|-----------------|
| <b>Vascular disorders</b> | <b>23 (10.1)</b> | <b>25 (10.6)</b> | <b>5 (6.1)</b> | <b>13 (16.9)</b> | <b>4 (11.4)</b> | <b>4 (15.4)</b> | <b>3 (17.6)</b> | <b>4 (19.0)</b> |
| Deep vein thrombosis      | 1 (0.4)          | 5 (2.1)          | 0              | 3 (3.9)          | 0               | 0               | 1 (5.9)         | 0               |
| Hematoma                  | 1 (0.4)          | 1 (0.4)          | 0              | 0                | 0               | 0               | 1 (5.9)         | 0               |
| Hypotension               | 11 (4.8)         | 8 (3.4)          | 0              | 6 (7.8)          | 4 (11.4)        | 2 (7.7)         | 0               | 2 (9.5)         |
| Phlebitis                 | 1 (0.4)          | 0                | 1 (1.2)        | 0                | 0               | 0               | 1 (5.9)         | 0               |
| Varicose vein             | 0                | 0                | 0              | 0                | 0               | 0               | 1 (5.9)         | 0               |

---

AE, adverse event; CL<sub>CR</sub>, creatinine clearance; C/T, ceftolozane/tazobactam; MEM, meropenem; RI, renal impairment.

<sup>a</sup>Most common AEs were defined as an incidence rate of  $\geq 5\%$  in at least one renal function group/treatment arm.

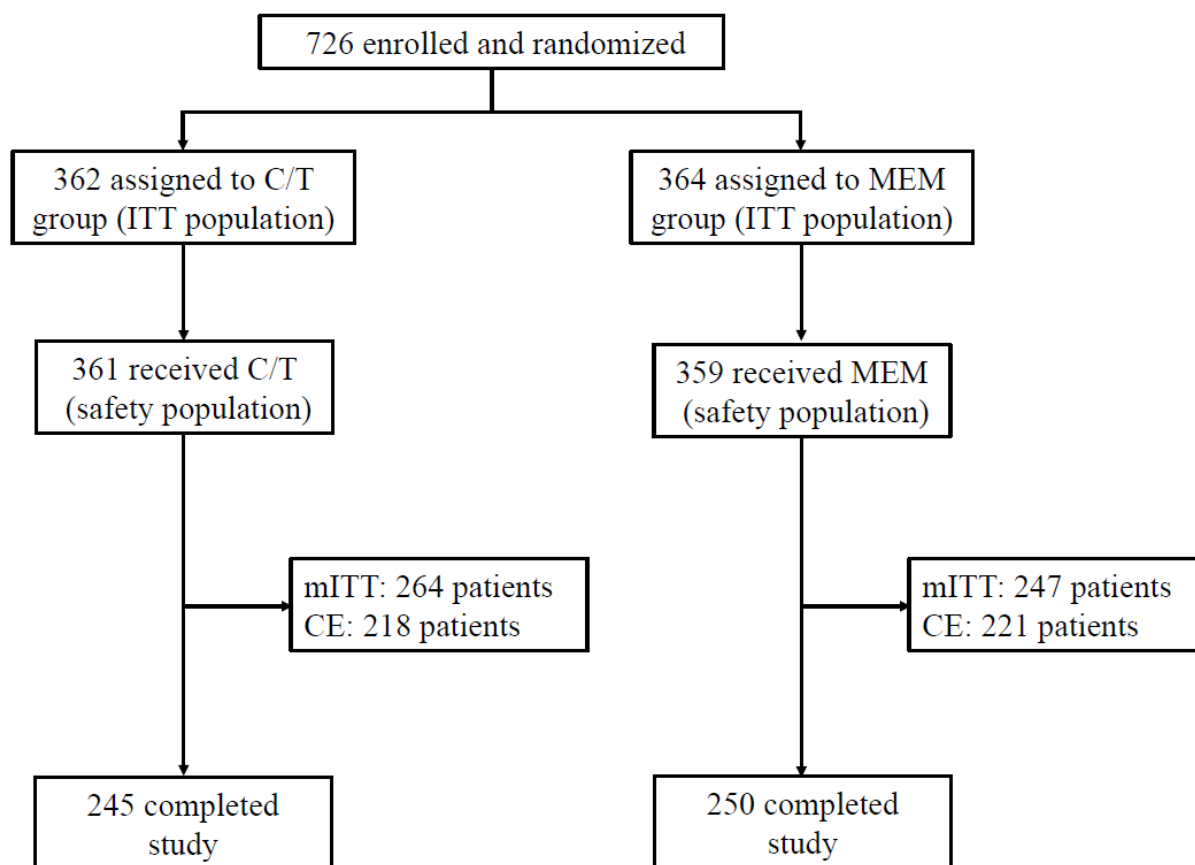

**Supplementary Fig. S1.** Patient disposition. The ITT population included all randomized patients, regardless of whether they received study drug. The mITT population, which was a subset of the ITT population, received any amount of study drug and had at least one bacterial respiratory pathogen isolated from the baseline lower respiratory tract culture that was susceptible to at least one study drug. The CE population, which was a subset of the ITT population, received study drug, adhered to the study protocol through the TOC visit, and had an evaluable clinical outcome (cure or failure) at the TOC visit. CE, clinically evaluable; C/T, ceftolozane/tazobactam; ITT, intention-to-treat; MEM, meropenem; mITT, microbiological intention-to-treat; TOC, test of cure.
